# Supplementary material
Source: Springer Nature journal article supplement (https://www.springermedizin.de/resource/supplementary/12939_2013_365_MOESM1_ESM.pdf/9550978)
Supplement: MOESM1 [file 9550978]

Health condition

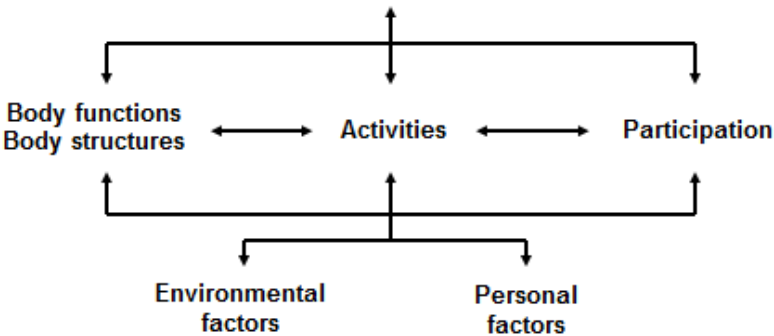

Body functions  
Body structures

Activities

Participation

Environmental  
factors

Personal  
factors
